# Supplementary material for: Inhabited subsurface wet smectites in the hyperarid core of the Atacama Desert as an analog for the search for life on Mars
Source: PubMed Central journal article supplement (PMC7645800; doi:10.1038/s41598-020-76302-z), 2020-11-05
Supplement: 41598_2020_76302_MOESM1_ESM.pdf [file 41598_2020_76302_MOESM1_ESM.pdf]

# Inhabited subsurface wet smectites in the hyperarid core of the Atacama Desert as an analog for the search for life on Mars

Armando Azua-Bustos<sup>1,2\*</sup>, Alberto G. Fairén<sup>1,3\*</sup>, Carlos González Silva<sup>4</sup>, Daniel Carrizo<sup>1</sup>, Miguel Ángel Fernández-Martínez<sup>1,5</sup>, Cristián Arenas-Fajardo<sup>6</sup>, Maite Fernández-Sampedro<sup>1</sup>, Carolina Gil-Lozano<sup>1,7</sup>, Laura Sánchez-García<sup>1</sup>, Carmen Ascaso<sup>8</sup>, Jacek Wierzbos<sup>8</sup>, and Elizabeth B. Rampe<sup>9</sup>.

<sup>1</sup>Centro de Astrobiología (CSIC-INTA), 28850 Madrid, Spain.

<sup>2</sup>Instituto de Ciencias Biomédicas, Facultad de Ciencias de la Salud, Universidad Autónoma de Chile, Santiago, Chile.

<sup>3</sup>Department of Astronomy, Cornell University, Ithaca 14853 NY, USA.

<sup>4</sup>Facultad de Ciencias, Universidad de Tarapacá, Chile

<sup>5</sup>Department of Natural Resource Sciences, McGill University, Quebec, Canada.

<sup>6</sup>Atacama Research, Santiago, Chile.

<sup>7</sup>Laboratory of Planetology and Geodynamics, Université de Nantes, 44322 France.

<sup>8</sup>Museo Nacional de Ciencias Naturales (CSIC), 28006 Madrid, Spain.

<sup>9</sup>Astromaterials Research and Exploration Science Division, NASA Johnson Space Center, Houston, TX, USA.

\*Corresponding authors: Armando Azua-Bustos (aazua@cab.inta-csic.es) (to whom correspondence should be addressed) and Alberto G. Fairén (agfairen@cab.inta-csic.es) Centro de Astrobiología (CSIC-INTA), Madrid, Spain.

## Supplementary Information

### Supplemental Tables and Figures

**Supplemental Table S1.** Light penetration in the soil profile at Yungay.

| <b>Surface</b> | <b>1cm</b> | <b>3cm</b> |
|----------------|------------|------------|
| 124000         | 36         | 0          |
| 125000         | 30         | 0          |
| 125000         | 43         | 0          |

Light penetration (lux) was measured three times between 12:40 and 13:00.

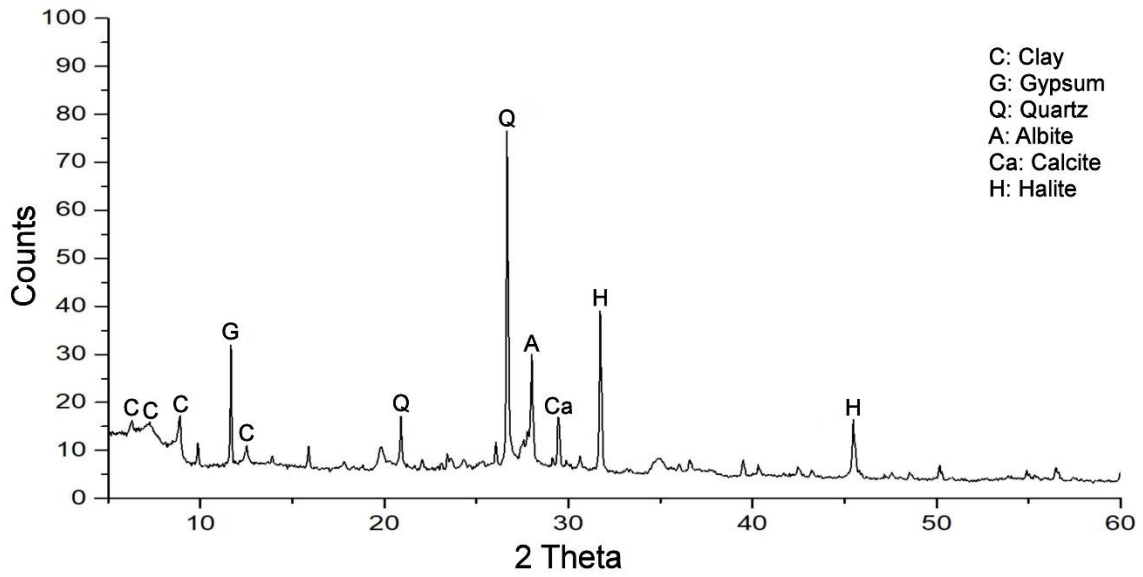

**Supplemental Figure S1.** Bulk powder XRD pattern of Yungay clay-rich sample collected at 40 cm depth.

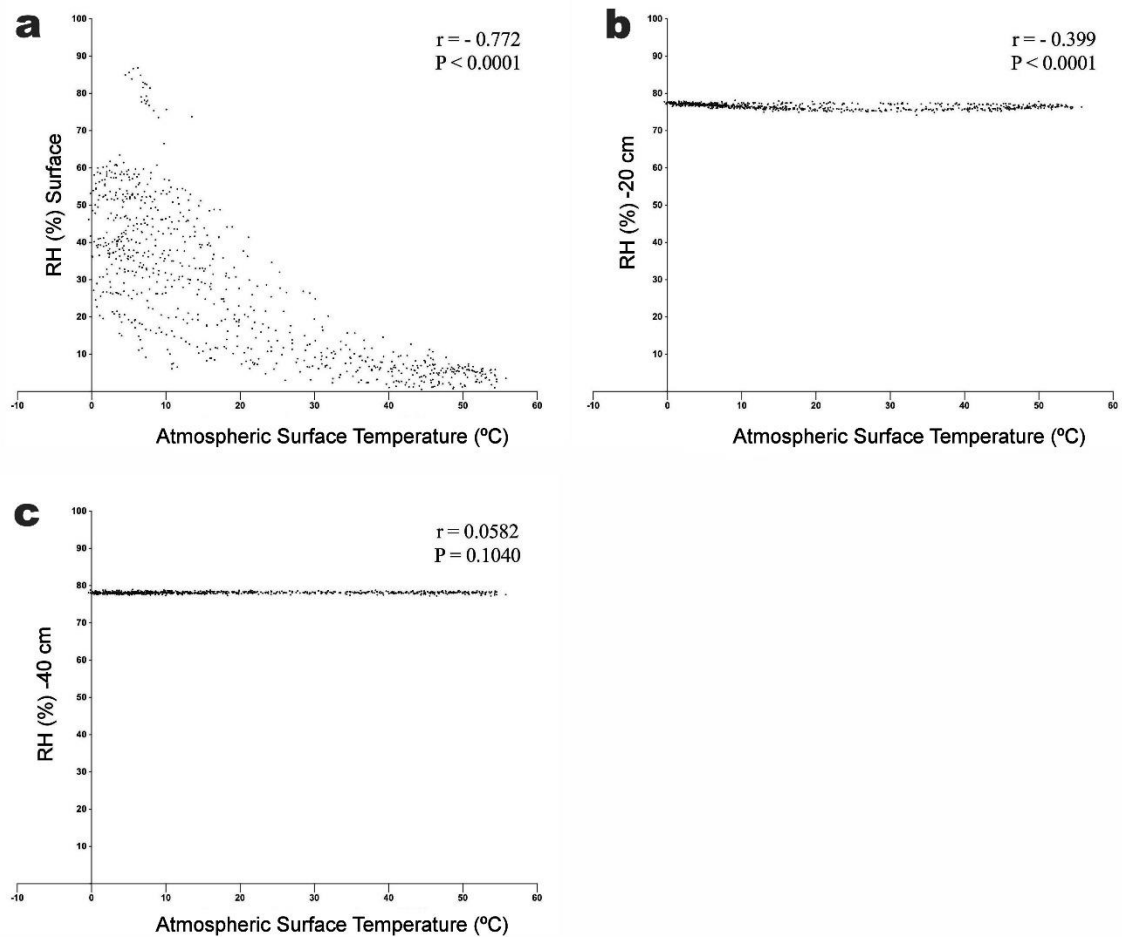

**Supplemental Figure S2.** Pearson correlation coefficient between atmospheric external temperatures and relative humidity at each soil depth. (a) Atmospheric temperature vs surface relative humidity. (b) Atmospheric temperature vs relative humidity at -20 cm. (c) Atmospheric temperature vs relative humidity at -40 cm.
